# Supplementary material for: Diverse π–π stacking motifs modulate electrical conductivity in tetrathiafulvalene-based metal–organic frameworks
Source: Royal Society of Chemistry journal article supplement (doi:10.1039/c9sc03348c), 2019-01-01
Supplement: c9sc03348c2.xlsx [file c9sc03348c2.xlsx]

## Sheet: 44 4-topic
RefCode in CSD	Authors	Publication	Composition	Ligand	π…π	Short aperture	Wide aperture	RLR	Orientation of ligands plane to rod direction	Shortest π…π contact between ligands	Longest π…π contact between ligands	Number of coordinated carboxylate groups	Stacks of parallel ligands	Space Group	hkl of rod	Rod topology	MOF periodicity (hkl for layers)	Vertex transitivity of PE&M net	PE&M representation	Vertex transitivity of STR net	STR representation
BEQJOZ	Jian-Jun Lin,Zhen Liu,Ling-Zhi Lv,Yun-Long Feng	WUJI HUAXUE XUEBAO(CHIN.)(CHIN.J.INORG.CHEM.),2018,34,,230	catena-(bis(\m-5,5'-(4H-1,2,4-triazole-3,5-diyl)bis(benzene-1,3-dicarboxylato))-hexaaqua-di-holmium(iii) hydroxide N,N-dimethylformamide solvate).	5,5'-(4H-1,2,4-triazole-3,5-diyl)bis(benzene-1,3-dicarboxylato)	dimer	4.991	10.322	2.06812	athwart	3.24 (C-C)	inapplicable	4	staggered	C2/m	[0,1,0]	2,4C4	3D	7	3,3,3,3,3,4,5-c new net with point symbol for net: {4.7.8}2{4.7.9}4{4^2.10^4}{4^2.7^2.8^2.9^4}2{7.8.9}2{7.8^2}2	5	3,3,3,4,4-c new net with point symbol {6.7.8}4{6.7^2.8^2.10}2{7^2.8^2.9.11}{7^2.8}2
BEQJUF	Jian-Jun Lin,Zhen Liu,Ling-Zhi Lv,Yun-Long Feng	WUJI HUAXUE XUEBAO(CHIN.)(CHIN.J.INORG.CHEM.),2018,34,,230	catena-(bis(\m-5,5'-(4H-1,2,4-triazole-3,5-diyl)bis(benzene-1,3-dicarboxylato))-hexaaqua-di-terbium(iii) hydroxide N,N-dimethylformamide solvate).	5,5'-(4H-1,2,4-triazole-3,5-diyl)bis(benzene-1,3-dicarboxylato)	dimer	4.996	10.326	2.06685	athwart	3.28 (C-C)	inapplicable	4	staggered	C2/m	[0,1,0]	2,4C4	3D	7	3,3,3,3,3,4,5-c new net with point symbol for net: {4.7.8}2{4.7.9}4{4^2.10^4}{4^2.7^2.8^2.9^4}2{7.8.9}2{7.8^2}2	5	3,3,3,4,4-c new net with point symbol {6.7.8}4{6.7^2.8^2.10}2{7^2.8^2.9.11}{7^2.8}2
PEYTEU	Wei-Hong Yan,Song-Song Bao,Liu-liu Ding,Chang-Sheng Lu,Qing-Jin Meng,Li-Min Zheng	Inorg.Chem.Commun.,2013,28,,20	catena-[(\m~4~-4,8-Dicarboxy-9,10-dioxo-9,10-dihydroanthracene-1,5-dicarboxylato)-(\m~4~-9,10-dioxo-9,10-dihydroanthracene-1,4,5,8-tetracarboxylato)-octa-aqua-di-erbium(iii) hexahydrate].	9,10-dioxo-9,10-dihydroanthracene-1,4,5,8-tetracarboxylato	1D column	5.145	5.816	1.13042	athwart	3.640 (C-C)	3.640 (C-C)	2	staggered	P-1	[1,0,0]	2,4C4	2D (0,1,0)	2	3,4-c bex; 3,4L13	1	4-c sql
PEYTOE	Wei-Hong Yan,Song-Song Bao,Liu-liu Ding,Chang-Sheng Lu,Qing-Jin Meng,Li-Min Zheng	Inorg.Chem.Commun.,2013,28,,20	catena-[(\m~4~-4,8-Dicarboxy-9,10-dioxo-9,10-dihydroanthracene-1,5-dicarboxylato)-(\m~4~-9,10-dioxo-9,10-dihydroanthracene-1,4,5,8-tetracarboxylato)-octa-aqua-di-terbium(iii) hexahydrate].	9,10-dioxo-9,10-dihydroanthracene-1,4,5,8-tetracarboxylato	1D column	5.13	5.809	1.13236	athwart	3.621 (C-C)	3.621 (C-C)	2	staggered	P-1	[1,0,0]	2,4C4	2D (0,1,0)	2	3,4-c bex; 3,4L13	1	4-c sql
PEYTIY	Wei-Hong Yan,Song-Song Bao,Liu-liu Ding,Chang-Sheng Lu,Qing-Jin Meng,Li-Min Zheng	Inorg.Chem.Commun.,2013,28,,20	catena-[(\m~4~-4,8-Dicarboxy-9,10-dioxo-9,10-dihydroanthracene-1,5-dicarboxylato)-(\m~4~-9,10-dioxo-9,10-dihydroanthracene-1,4,5,8-tetracarboxylato)-octa-aqua-di-dysprosium(iii) dihydrate].	9,10-dioxo-9,10-dihydroanthracene-1,4,5,8-tetracarboxylato	1D column	5.171	5.801	1.12183	athwart	3.616 (C-C)	3.616 (C-C)	2	staggered	P-1	[1,0,0]	2,4C4	2D (0,1,0)	2	3,4-c bex; 3,4L13	1	4-c sql
PEYTUK	Wei-Hong Yan,Song-Song Bao,Liu-liu Ding,Chang-Sheng Lu,Qing-Jin Meng,Li-Min Zheng	Inorg.Chem.Commun.,2013,28,,20	catena-[(\m~4~-4,8-Dicarboxy-9,10-dioxo-9,10-dihydroanthracene-1,5-dicarboxylato)-(\m~4~-9,10-dioxo-9,10-dihydroanthracene-1,4,5,8-tetracarboxylato)-octa-aqua-di-europium(iii) dihydrate].	9,10-dioxo-9,10-dihydroanthracene-1,4,5,8-tetracarboxylato	1D column	5.118	5.764	1.12622	athwart	3.605 (C-C)	3.605 (C-C)	2	staggered	P-1	[1,0,0]	2,4C4	2D (0,1,0)	2	3,4-c bex; 3,4L13	1	4-c sql
ZEGROV	Xinran ZHANG,Ivan DA SILVA,Godfrey H.G.W.,Callear S.K.,Sapchenko S.A.,Yongqiang CHENG,Vitorica-Yrezaba I.J,Frogley M.D.,Gianfelice CINQUE,Tang C.C.,Giacobbe C.,Dejoie C.,Rudic S.,Ramirez-Cuesta A.J.,Denecke M.A.,Sihai YANG,Schroder M.	J.AM.CHEM.SOC.,2017,139,,16289	catena-[(\m-[1,1'-biphenyl]-3,3',5,5'-tetracarboxylato)-bis(\m-hydroxo)-bis(\m-hydroxo)-di-scandium(iii) diiodine solvate].	[1,1'-biphenyl]-3,3',5,5'-tetracarboxylato	no	4.981	7.097	1.42481	along	inapplicable	inapplicable	4	inapplicable	I4122	[0,0,1]	2,6C2	3D	3	3,3,6T203	2	3,4-c new net with point symbol {6^3}{6^5.10}
ZEGRIP	Xinran ZHANG,Ivan DA SILVA,Godfrey H.G.W.,Callear S.K.,Sapchenko S.A.,Yongqiang CHENG,Vitorica-Yrezaba I.J,Frogley M.D.,Gianfelice CINQUE,Tang C.C.,Giacobbe C.,Dejoie C.,Rudic S.,Ramirez-Cuesta A.J.,Denecke M.A.,Sihai YANG,Schroder M.	J.AM.CHEM.SOC.,2017,139,,16289	catena-[(\m-[1,1'-biphenyl]-3,3',5,5'-tetracarboxylato)-bis(\m-hydroxo)-bis(\m-hydroxo)-di-scandium(iii) diiodine solvate].	[1,1'-biphenyl]-3,3',5,5'-tetracarboxylato	no	4.934	7.134	1.44589	along	inapplicable	inapplicable	4	inapplicable	I4122	[0,0,1]	2,6C2	3D	3	3,3,6T203	2	3,4-c new net with point symbol {6^3}{6^5.10}
YAFKAU	Yun LUO,Guillou O.,Daiguebonne C.	CSD Communication(Private Communication),2016,,,	catena-[tris(\m-benzene-1,2,4,5-tetracarboxylato)-dodeca-aqua-tetra-praseodymium dodecahydrate].	1,2,4,5-Benzenetetracarboxylato	no	3.206	4.977	1.5524	along	inapplicable	inapplicable	4	inapplicable	P21	[0,1,0]	2,4C4	2D (1,0,1)	7	3,3,3,4,4,6,6-c new net with point symbol {3.4.5}6{3^2.4^2.5^2.6^2.7^4.8^2.9}2{3^2.4^2.5^2.6^3.7^4.8^2}{3^2.6^2.7^2}3	4	4,4,4,4-c new net with point symbol {3^2.4.6^2.7}2{3^2.6^2.7^2}7
FEQWOO	Yi-Bo WANG,Wen-Juan ZHUANG,Lin-Pei JIN,Shao-Zhe LU	J.MOL.STRUCT.,2005,737,,165	catena-(4,4'-Bipyridiniumbis(\m~6~-benzene-1,2,4,5-tetracarboxylato)-di-praseodymium(iii) hydrate).	1,2,4,5-Benzenetetracarboxylato	no	3.14	4.921	1.5672	along	inapplicable	inapplicable	4	inapplicable	P-1	[1,0,0]	2,2,6C2	3D	6	3,3,3,4,4,7-c new net with point symbol {4.5.6}2{4^2.6}4{4^2.8^2.10^2}{4^8.5^4.6^5.7^3.8}2{5^2.6^2.9^2}	5	3,4,4,4,6-c new net with point symbol {4.5.6}2{4^2.5^3.7}{4^2.5^4.6^2.8^6.9}{4^2.8^3.10}{5^2.6^2.8.9}
TINCAV	Q.B.Bo,Z.X.Sun,Y.L.Sheng,Z.W.Zhang,G.X.Sun,C.L.Chen,Y.X.Li	J.Inorg.Organomet.Polym.Mater.,2006,16,,241	catena-[(\m~6~-Hydrogen 1,2,4,5-benzenetetracarboxylato)-praseodymium(iii)].	1,2,4,5-Benzenetetracarboxylato	1D column	3.107	4.901	1.57741	athwart	3.599 (C-C)	3.599 (C-C)	4	staggered	P-1	[0,1,0]	2,4C4	3D	3	3,4,6T160	2	4,4-c bbf
AFOJIO	Daofeng Sun,Rong Cao,Yucang Liang,Qian Shi,Maochun Hong	J.CHEM.SOC.,DALTON TRANS.,2002,,,1847	catena-((\m~6~-1,2,4,5-Benzenetetracarboxylato)-gadolinium).	1,2,4,5-Benzenetetracarboxylato	1D column	3.129	4.932	1.57622	athwart	3.444 (C-C)	3.571 (C-C)	4	staggered	P-1	[0,1,0]	2,4C4	3D	3	3,4,6T160	2	4,4-c bbf
FEQWUU	Yi-Bo WANG,Wen-Juan ZHUANG,Lin-Pei JIN,Shao-Zhe LU	J.MOL.STRUCT.,2005,737,,165	catena-(4,4'-Bipyridiniumbis(\m~6~-benzene-1,2,4,5-tetracarboxylato)-di-europium(iii)).	1,2,4,5-Benzenetetracarboxylato	no	3.113	4.921	1.58079	along	inapplicable	inapplicable	4	inapplicable	P-1	[1,0,0]	2,2,6C2	3D	6	3,3,3,4,4,7-c new net with point symbol {4.5.6}2{4^2.6}4{4^2.8^2.10^2}{4^8.5^4.6^5.7^3.8}2{5^2.6^2.9^2}	5	3,4,4,4,6-c new net with point symbol {4.5.6}2{4^2.5^3.7}{4^2.5^4.6^2.8^6.9}{4^2.8^3.10}{5^2.6^2.8.9}
QETSOY01	Zhi-Rong LUO,Lan-Shan LIAO,Xian-Hong YIN	Synth.React.Inorg.,Met.-Org.,Nano-Met.Chem.,2014,44,,1086	catena-((\m~6~-Benzene-1,2,4,5-tetracarboxylato)-(\m~4~-2,5-dicarboxybenzene-1,4-dicarboxylato)-diaqua-di-erbium(iii)).	1,2,4,5-Benzenetetracarboxylato	no	3.089	4.898	1.58563	along	inapplicable	inapplicable	4+2	inapplicable	P21/c	[0,1,0]	2,6C1	3D	5	3,3,3,4,6-c new net with point symbol {4.10^2}2{4^2.6}4{4^2.8^2.10^2}{4^7.6^4.8^4}2	2	4,5T61
FEQXAB	Yi-Bo WANG,Wen-Juan ZHUANG,Lin-Pei JIN,Shao-Zhe LU	J.MOL.STRUCT.,2005,737,,165	catena-(4,4'-Bipyridiniumbis(\m~6~-benzene-1,2,4,5-tetracarboxylato)-di-gadolinium(iii)).	1,2,4,5-Benzenetetracarboxylato	no	3.1	4.917	1.58613	along	inapplicable	inapplicable	4	inapplicable	P-1	[1,0,0]	2,2,6C2	3D	6	3,3,3,4,4,7-c new net with point symbol {4.5.6}2{4^2.6}4{4^2.8^2.10^2}{4^8.5^4.6^5.7^3.8}2{5^2.6^2.9^2}	5	3,4,4,4,6-c new net with point symbol {4.5.6}2{4^2.5^3.7}{4^2.5^4.6^2.8^6.9}{4^2.8^3.10}{5^2.6^2.8.9}
GEVXAI	Canadillas-Delgado L,Pasan J.,Fabelo O.,Julve M.,Lloret F.,Ruiz-Perez C.	POLYHEDRON,2013,52,,321	catena-((\m~6~-Benzene-1,2,4,5-tetracarboxylato)-(\m~4~-dihydrogenbenzene-1,2,4,5-tetracarboxylato)-diaqua-di-gadolinium tetrahydrate).	1,2,4,5-Benzenetetracarboxylato	no	3.082	4.892	1.58728	along	inapplicable	inapplicable	4+2	inapplicable	P21/n	[0,1,0]	2,6C1	3D	5	3,3,3,4,6-c new net with point symbol {4.10^2}2{4^2.6}4{4^2.8^2.10^2}{4^7.6^4.8^4}2	2	4,5T61
GEVXAI01	Acar Y.	Anadolu Universitesi Bilim ve Teknoloji Dergisi A- Uygulamali Bilimler ve Muhendislik,2016,17,,754	catena-((\m~6~-Benzene-1,2,4,5-tetracarboxylato)-(\m~4~-dihydrogenbenzene-1,2,4,5-tetracarboxylato)-diaqua-di-gadolinium tetrahydrate).	1,2,4,5-Benzenetetracarboxylato	no	3.068	4.878	1.58996	along	inapplicable	inapplicable	4+2	inapplicable	P21/n	[0,1,0]	2,6C1	3D	5	3,3,3,4,6-c new net with point symbol {4.10^2}2{4^2.6}4{4^2.8^2.10^2}{4^7.6^4.8^4}2	2	4,5T61
MITGUR01	Mao-Lin HU,Nan-Wen ZHU,Xin-Hua LI,Fan CHEN	Cryst.Res.Technol.,2004,39,,505	catena-((\m~6~-1,2,4,5-Benzenetetracarboxylato)-(\m~4~-benzene-1,4-dicarboxylato-2,5-dicarboxylic acid)-diaqua-di-terbium(iii) tetrahydrate).	1,2,4,5-Benzenetetracarboxylato	no	3.082	4.902	1.59053	along	inapplicable	inapplicable	4+2	inapplicable	P21/n	[0,1,0]	2,6C1	3D	5	3,3,3,4,6-c new net with point symbol {4.10^2}2{4^2.6}4{4^2.8^2.10^2}{4^7.6^4.8^4}2	2	4,5T61
ULEHEA	M.Tabatabaee,R.Mohammadinasab,M.Aghaie	J.Inorg.Organomet.Polym.Mater.,2016,26,,127	catena-[(\m~6~-Benzene-1,2,4,5-tetracarboxylato)-(\m~4~-2,5-dicarboxybenzene-1,4-dicarboxylato)-diaqua-di-samarium tetrahydrate].	1,2,4,5-Benzenetetracarboxylato	no	3.079	4.898	1.59078	along	inapplicable	inapplicable	4+2	inapplicable	P21/n	[0,1,0]	2,6C1	3D	3	3,3,3,4,6-c new net with point symbol {4.10^2}2{4^2.6}4{4^2.8^2.10^2}{4^7.6^4.8^4}2	2	4,5T61
TEBFUD	Wei-Wei BAI,Ning ZHU,Li-Min HAN,Hai-Long HONG,Yuan-Yuan GAO,Quan-Ling SUO	Jiegou Huaxue(Chin.)(Chin.J.Struct.Chem.),2012,31,,1021	catena-[(\m~6~-Benzene-1,2,4,5-tetracarboxylato)-(\m~4~-2,5-dicarboxybenzene-1,4-dicarboxylato)-diaqua-di-dysprosium(iii) tetrahydrate].	1,2,4,5-Benzenetetracarboxylato	no	3.076	4.896	1.59168	along	inapplicable	inapplicable	4+2	inapplicable	P21/n	[0,1,0]	2,6C1	3D	5	3,3,3,4,6-c new net with point symbol {4.10^2}2{4^2.6}4{4^2.8^2.10^2}{4^7.6^4.8^4}2	2	4,5T61
MIRLUU	Chuan-De WU,Can-Zhong LU,Wen-Bin YANG,Shao-Fang LU,Hong-Hui ZHUANG,Jin-Shun HUANG	EUR.J.INORG.CHEM.,2002,,,797	catena-((\m~6~-1,2,4,5-Benzenetetracarboxylato-)-(\m~4~-1,2,4,5-benzenetetracarboxylato)-diaqua-di-europium(iii) tetrahydrate).	1,2,4,5-Benzenetetracarboxylato	no	3.073	4.895	1.59291	along	inapplicable	inapplicable	4+2	inapplicable	P21/n	[0,1,0]	2,6C1	3D	5	3,3,3,4,6-c new net with point symbol {4.10^2}2{4^2.6}4{4^2.8^2.10^2}{4^7.6^4.8^4}2	2	4,5T61
QETSOY	Bo Q.B.,Sun Z.X.,Sheng Y.L.,Zhang Z.W.,Sun G.X.,Chen C.L.,Li Y.X.,Wang D.Q.	Struct.Chem.,2006,17,,609	catena-((\m~6~-Benzene-1,2,4,5-tetracarboxylato)-(\m~4~-2,5-dicarboxybenzene-1,4-dicarboxylato)-diaqua-di-erbium(iii) tetrahydrate).	1,2,4,5-Benzenetetracarboxylato	no	3.081	4.91	1.59364	along	inapplicable	inapplicable	4+2	inapplicable	P21/n	[0,1,0]	2,6C1	3D	5	3,3,3,4,6-c new net with point symbol {4.10^2}2{4^2.6}4{4^2.8^2.10^2}{4^7.6^4.8^4}2	2	4,5T61
MITGUR	Rong CAO,Daofeng SUN,Yucang LIANG,Maochun HONG,Tatsumi K.,Qian SHI	INORG.CHEM.,2002,41,,2087	catena-(Diaqua-(\m~6~-benzene-1,2,4,5-tetracarboxylato)-(\m~4~-benzene-1,4-dicarboxylato-2,5-dicarboxylic acid)-di-terbium tetrahydrate).	1,2,4,5-Benzenetetracarboxylato	no	3.066	4.916	1.60339	along	inapplicable	inapplicable	4+2	inapplicable	P21/n	[0,1,0]	2,6C1	3D	5	3,3,3,4,6-c new net with point symbol {4.10^2}2{4^2.6}4{4^2.8^2.10^2}{4^7.6^4.8^4}2	2	4,5T61
PEYVAS	Wei-Hong Yan,Song-Song Bao,Liu-liu Ding,Chang-Sheng Lu,Qing-Jin Meng,Li-Min Zheng	Inorg.Chem.Commun.,2013,28,,20	catena-[(\m~4~-4,8-Dicarboxy-9,10-dioxo-9,10-dihydroanthracene-1,5-dicarboxylato)-(\m~4~-9,10-dioxo-9,10-dihydroanthracene-1,4,5,8-tetracarboxylato)-octa-aqua-di-samarium(iii) hexahydrate].	9,10-dioxo-9,10-dihydroanthracene-1,4,5,8-tetracarboxylato	1D column	5.154	5.792	1.12379	athwart	3.568 (C-C)	3.568 (C-C)	2	staggered	P-1	[1,0,0]	2,4C4	2D (0,1,0)	2	3,4-c bex; 3,4L13	1	4-c sql
PEYVEW	Wei-Hong Yan,Song-Song Bao,Liu-liu Ding,Chang-Sheng Lu,Qing-Jin Meng,Li-Min Zheng	Inorg.Chem.Commun.,2013,28,,20	catena-[(\m~4~-4,8-Dicarboxy-9,10-dioxo-9,10-dihydroanthracene-1,5-dicarboxylato)-(\m~4~-9,10-dioxo-9,10-dihydroanthracene-1,4,5,8-tetracarboxylato)-octa-aqua-di-neodymium(iii) pentahydrate].	9,10-dioxo-9,10-dihydroanthracene-1,4,5,8-tetracarboxylato	1D column	5.164	5.895	1.14156	athwart	3.566 (C-C)	3.566 (C-C)	2	staggered	P-1	[1,0,0]	2,4C4	2D (0,1,0)	2	3,4-c bex; 3,4L13	1	4-c sql
ERUPEM	Dao-Feng Sun,Wen-Hua Bi,Rong Cao,Xing Li,Qian Shi,Mao-Chun Hong	CHIN.J.CHEM.,2003,21,,405	catena-((\m~6~-Benzene-1,2,4,5-tetracarboxylato)-(\m~6~-benzene-1,4-dicarboxylato-2,5-dicarboxylic acid)-diaqua-di-lanthanum).	1,2,4,5-Benzenetetracarboxylato	1D column	3.047	4.948	1.62389	athwart	3.492 (C-C)	3.492 (C-C)	4	slipped-parallel	P-1	[1,0,-1]	2,4C4	3D	3	3,4,6-c new net with point symbol {4.6^2}2{4^2.6^6.7.8^5.9}{6^4.7.8}	2	4,4-c vtx/I 41/a m d->F d d d (a-b,a+b,c;1/4,3/4,1/4);Bond sets: 1,3:vtx
ERUPEM01	Yi-Hang Wen,Jian Zhang,Zhao-Ji Li,Ye-Yan Qin,Yao Kang,Rui-Feng Hu,Jian-Kai Cheng,Yuan-Gen Yao	ACTA CRYSTALLOGR.,SECT.E:STRUCT.REP.ONLINE,2004,60,,m535	catena-((\m~6~-Benzene-1,2,4,5-tetracarboxylato)-(\m~6~-2,5-dicarboxybenzene-1,4-dicarboxylato)-bis(aqua-lanthanum(iii))).	1,2,4,5-Benzenetetracarboxylato	1D column	3.052	4.964	1.62647	athwart	3.489 (C-C)	3.489 (C-C)	4	slipped-parallel	P-1	[1,0,-1]	2,4C4	3D	3	3,4,6-c new net with point symbol {4.6^2}2{4^2.6^6.7.8^5.9}{6^4.7.8}	2	4,4-c vtx/I 41/a m d->F d d d (a-b,a+b,c;1/4,3/4,1/4);Bond sets: 1,3:vtx
PIQSOX	O.M.Yaghi,H.Li,T.L.Groy	Z.KRISTALLOGR.-NEW CRYST.STRUCT.,1997,212,,457	catena-(bis(\m~6~-1,2,4,5-Benzenetetracarboxylato)-diaqua-di-cerium(iii)).	1,2,4,5-Benzenetetracarboxylato	1D column	3.042	4.948	1.62656	athwart	3.476 (C-C)	3.476 (C-C)	4	slipped-parallel	P-1	[1,0,-1]	2,4C4	3D	3	3,4,6-c new net with point symbol {4.6^2}2{4^2.6^6.7.8^5.9}{6^4.7.8}	2	4,4-c vtx/I 41/a m d->F d d d (a-b,a+b,c;1/4,3/4,1/4);Bond sets: 1,3:vtx
AFOJEK01	Xiaohu Li,Yanping Wang,Zhiyun Ma,Ronglan Zhang,Jianshe Zhao	J.Coord.Chem.,2010,63,,1029	catena-[(\m-benzene-1,2,4,5-tetracarboxylato)-(\m-2,5-dicarboxyterephthalato)-diaqua-di-neodymium].	1,2,4,5-Benzenetetracarboxylato	1D column	3.065	4.978	1.62414	athwart	3.475 (C-C)	3.475 (C-C)	4	slipped-parallel	P-1	[1,0,-1]	2,4C4	3D	3	3,4,6-c new net with point symbol {4.6^2}2{4^2.6^6.7.8^5.9}{6^4.7.8}	2	4,4-c vtx/I 41/a m d->F d d d (a-b,a+b,c;1/4,3/4,1/4);Bond sets: 1,3:vtx
PIQSOX02	Miao-Juan Ren,Zhong Zhang,Peng Zhao,Jun Zhang	ASIAN J.CHEM.,2008,20,,3687	catena-[(\m~6~-Benzene-1,2,4,5-tetracarboxylato)-(\m~6~-benzene-1,4-dicarboxylato-2,5-dicarboxylic acid)-diaqua-di-cerium(iii)].	1,2,4,5-Benzenetetracarboxylato	1D column	3.059	4.956	1.62014	athwart	3.474 (C-C)	3.474 (C-C)	4	slipped-parallel	P-1	[1,0,-1]	2,4C4	3D	3	3,4,6-c new net with point symbol {4.6^2}2{4^2.6^6.7.8^5.9}{6^4.7.8}	2	4,4-c vtx/I 41/a m d->F d d d (a-b,a+b,c;1/4,3/4,1/4);Bond sets: 1,3:vtx
PIQSOX03	Y.Acar	Anadolu Universitesi Bilim ve Teknoloji Dergisi A- Uygulamali Bilimler ve Muhendislik,2016,17,,754	catena-(bis(\m~6~-1,2,4,5-Benzenetetracarboxylato)-diaqua-di-cerium(iii)).	1,2,4,5-Benzenetetracarboxylato	1D column	3.039	4.921	1.61928	athwart	3.473 (C-C)	3.473 (C-C)	4	slipped-parallel	P-1	[1,0,-1]	2,4C4	3D	3	3,4,6-c new net with point symbol {4.6^2}2{4^2.6^6.7.8^5.9}{6^4.7.8}	2	4,4-c vtx/I 41/a m d->F d d d (a-b,a+b,c;1/4,3/4,1/4);Bond sets: 1,3:vtx
NATREH01	Jia-Jun Yang,Xiao-Yang Yu,Yu-Hui Luo,Hong Zhang,Wei-Ping Gao	Inorg.Chem.Commun.,2015,61,,16	catena-((\m~6~-2,5-Dicarboxybenzene-1,4-dicarboxylato)-(\m~6~-benzene-1,2,4,5-tetracarboxylato)-diaqua-di-praseodymium).	1,2,4,5-Benzenetetracarboxylato	1D column	3.028	4.962	1.63871	athwart	3.471 (C-C)	3.471 (C-C)	4	slipped-parallel	P-1	[1,0,-1]	2,4C4	3D	3	3,4,6-c new net with point symbol {4.6^2}2{4^2.6^6.7.8^5.9}{6^4.7.8}	2	4,4-c vtx/I 41/a m d->F d d d (a-b,a+b,c;1/4,3/4,1/4);Bond sets: 1,3:vtx
NATREH02	Zhi-Rong Luo	CSD Communication(Private Communication),2015,,,	catena-[(\m-benzene-1,2,4,5-tetracarboxylato)-(\m-dihydrogenbenzene-1,2,4,5-tetracarboxylato)-diaqua-di-praseodymium].	1,2,4,5-Benzenetetracarboxylato	1D column	3.042	4.956	1.62919	athwart	3.468 (C-C)	3.468 (C-C)	4	slipped-parallel	P-1	[1,0,-1]	2,4C4	3D	3	3,4,6-c new net with point symbol {4.6^2}2{4^2.6^6.7.8^5.9}{6^4.7.8}	2	4,4-c vtx/I 41/a m d->F d d d (a-b,a+b,c;1/4,3/4,1/4);Bond sets: 1,3:vtx
NATREH	Li Guo,Gang Wu,Hui-Hui Li	J.Chem.Cryst.,2012,42,,192	catena-((\m~6~-2,5-dicarboxybenzene-1,4-dicarboxylato)-(\m~6~-benzene-1,2,4,5-tetracarboxylato)-diaqua-di-praseodymium(iii)).	1,2,4,5-Benzenetetracarboxylato	1D column	3.054	4.964	1.62541	athwart	3.466 (C-C)	3.466 (C-C)	4	slipped-parallel	P-1	[1,0,-1]	2,4C4	3D	3	3,4,6-c new net with point symbol {4.6^2}2{4^2.6^6.7.8^5.9}{6^4.7.8}	2	4,4-c vtx/I 41/a m d->F d d d (a-b,a+b,c;1/4,3/4,1/4);Bond sets: 1,3:vtx
PIQSOX01	Hai-Lin Fan,Min-Hua Cao,Ya-Juan Qi,Li Mao,Chang-Wen Hu,En-Bo Wang	Gaodeng Xuexiao Huaxue Xuebao(Chin.)(Chem.J.Chin.Univ.(Chinese Edition)),2004,25,,1419	catena-((\m~6~-Benzene-1,2,4,5-tetracarboxylato)-(\m~6~-1,4-dicarboxybenzene-2,5-dicarboxylato)-diaqua-di-cerium(iii)).	1,2,4,5-Benzenetetracarboxylato	1D column	3.042	4.927	1.61966	athwart	3.466 (C-C)	3.466 (C-C)	4	slipped-parallel	P-1	[1,0,-1]	2,4C4	3D	3	3,4,6-c new net with point symbol {4.6^2}2{4^2.6^6.7.8^5.9}{6^4.7.8}	2	4,4-c vtx/I 41/a m d->F d d d (a-b,a+b,c;1/4,3/4,1/4);Bond sets: 1,3:vtx
OXIXIE	C.Y.Li,D.M.Cai,J.C.Yin,L.P.Cai,M.Zeng,J.Wang,W.H.Zhu	Koord.Khim.(Russ.)(Coord.Chem.),2016,42,,476	catena-[(\m-benzene-1,2,4,5-tetracarboxylato)-(\m-2,5-dicarboxyterephthalato)-diaqua-di-neodymium].	1,2,4,5-Benzenetetracarboxylato	1D column	3.054	4.973	1.62836	athwart	3.460 (C-C)	3.460 (C-C)	4	slipped-parallel	P-1	[1,0,-1]	2,4C4	3D	3	3,4,6-c new net with point symbol {4.6^2}2{4^2.6^6.7.8^5.9}{6^4.7.8}	2	4,4-c vtx/I 41/a m d->F d d d (a-b,a+b,c;1/4,3/4,1/4);Bond sets: 1,3:vtx
AFOJEK	Daofeng Sun,Rong Cao,Yucang Liang,Qian Shi,Maochun Hong	J.CHEM.SOC.,DALTON TRANS.,2002,,,1847	catena-[(\m-benzene-1,2,4,5-tetracarboxylato)-(\m-2,5-dicarboxyterephthalato)-diaqua-di-neodymium].	1,2,4,5-Benzenetetracarboxylato	1D column	3.032	4.918	1.62203	athwart	3.46 (C-C)	3.46 (C-C)	4	slipped-parallel	P-1	[1,0,-1]	2,4C4	3D	3	3,4,6-c new net with point symbol {4.6^2}2{4^2.6^6.7.8^5.9}{6^4.7.8}	2	4,4-c vtx/I 41/a m d->F d d d (a-b,a+b,c;1/4,3/4,1/4);Bond sets: 1,3:vtx
NATQUW	Li Guo,Gang Wu,Hui-Hui Li	J.Chem.Cryst.,2012,42,,192	catena-((\m~6~-2,5-dicarboxybenzene-1,4-dicarboxylato)-(\m~6~-benzene-1,2,4,5-tetracarboxylato)-diaqua-di-europium(iii)).	1,2,4,5-Benzenetetracarboxylato	1D column	3.06	4.961	1.62124	athwart	3.44 (C-C)	3.44 (C-C)	4	slipped-parallel	P-1	[1,0,-1]	2,4C4	3D	3	3,4,6-c new net with point symbol {4.6^2}2{4^2.6^6.7.8^5.9}{6^4.7.8}	2	4,4-c vtx/I 41/a m d->F d d d (a-b,a+b,c;1/4,3/4,1/4);Bond sets: 1,3:vtx
NOHGEX	Guillou O.,Daiguebonne C.,Calvez G.,Le DRETF.,Car P.-E.	J.Alloys Compd.,2008,451,,329	catena-(bis(\m~4~-benzene-1,2,4,5-tetracarboxylato)-tetrakis(N,N-dimethylformamide-O)-bis(nitrato-O,O')-di-yttrium(iii)).	1,2,4,5-Benzenetetracarboxylato	no	3.016	4.978	1.65053	along	inapplicable	inapplicable	4	inapplicable	P-1	[1,0,0]	2,4C4	2D (0,0,1)	3	3,4,4L15	1	4-c kgm
NATRAD	Li Guo,Gang Wu,Hui-Hui Li	J.Chem.Cryst.,2012,42,,192	catena-((\m~6~-2,5-dicarboxybenzene-1,4-dicarboxylato)-(\m~6~-benzene-1,2,4,5-tetracarboxylato)-diaqua-di-gadolinium(iii)).	1,2,4,5-Benzenetetracarboxylato	1D column	3.057	4.962	1.62316	athwart	3.435 (C-C)	3.435 (C-C)	4	slipped-parallel	P-1	[1,0,-1]	2,4C4	3D	3	3,4,6-c new net with point symbol {4.6^2}2{4^2.6^6.7.8^5.9}{6^4.7.8}	2	4,4-c vtx/I 41/a m d->F d d d (a-b,a+b,c;1/4,3/4,1/4);Bond sets: 1,3:vtx
HAZBOA	Yu-Mei Dai,Xiao-Qin Wang,Jin-Feng Huang	ACTA CRYSTALLOGR.,SECT.E:STRUCT.REP.ONLINE,2005,61,,m2548	catena((\m~6~-benzene-1,2,4,5-tetracarboxylato)-(\m~6~-2,5-dicarboxybenzene-1, 4-dicarboxylato)-diaqua-di-samarium).	1,2,4,5-Benzenetetracarboxylato	1D column	3.047	4.956	1.62652	athwart	3.43 (C-C)	3.43 (C-C)	4	slipped-parallel	P-1	[1,0,-1]	2,4C4	3D	3	3,4,6-c new net with point symbol {4.6^2}2{4^2.6^6.7.8^5.9}{6^4.7.8}	2	4,4-c vtx/I 41/a m d->F d d d (a-b,a+b,c;1/4,3/4,1/4);Bond sets: 1,3:vtx
WICLEC	Qi Yu,Hong Dong,Xin Zhang,Ya-Xin Zhu,Jian-Hui Wang,Feng-Ming Zhang,Xiao-Jun Sun	CRYSTENGCOMM,2018,20,,3228	catena-[(\m-5,5'-diazene-1,2-diyldiisophthalato)-bis(\m-hydroxo)-diaqua-di-dysprosium(iii) dihydrate].	5,5'-diazene-1,2-diyldiisophthalato	1D column	4.979	9.143	1.83631	athwart	3.410 (C-C)	3.410 (C-C)	4	eclipsed	P21/n	[1,0,0]	2,3,5C3	3D	4	3,3,3,6-c new net with point symbol {4.9^2}{4^2.6}{4^7.6^3.9^3.10.11}{9^3}	inapplicable	inapplicable
DUDZOT	Shaowei Zhang,Eryue Duan,Peng Cheng	J.Mater.Chem.A,2015,3,,7157	catena-[(\m-5,5'-diazene-1,2-diyldiisophthalato)-bis(\m-oxo)-diaqua-di-gadolinium dihydrate].	5,5'-diazene-1,2-diyldiisophthalato	1D column	5.071	9.116	1.79767	athwart	3.32 (C-C)	3.32 (C-C)	4	eclipsed	P-1	[1,0,0]	2,2,3,7C3	3D	5	3,3,3,3,7T7	inapplicable	inapplicable
ZEJGED	Jun Zhao	CSD Communication(Private Communication),2017,,,	catena-[tris(\m-[1^1^,2^1^:2^4^,3^1^-terphenyl]-1^3^,1^5^,3^3^,3^5^-tetracarboxylato)-octaaqua-tetra-terbium(iii) unknown solvate].	[1^1^,2^1^:2^4^,3^1^-terphenyl]-1^3^,1^5^,3^3^,3^5^-tetracarboxylato	no	5.03	11.472	2.28072	along	inapplicable	inapplicable	4	inapplicable	Fddd	[1,0,0]	2,4C4	3D	5	3,3,3,3,5-c new net point symbol {4.6.8}4{4^2.6^3.8^4.10}2{6.13^2}{6.8^2}2	5	3,3,3,4,4-c new net with point symbol {6.10^2}{6.8^2}2{6^2.8^2.10^2}{6^2.8}2{6^3.8^2.10}
