# Supplementary material for: Diverse π–π stacking motifs modulate electrical conductivity in tetrathiafulvalene-based metal–organic frameworks
Source: Royal Society of Chemistry journal article supplement (doi:10.1039/c9sc03348c), 2019-01-01
Supplement: c9sc03348c3.xlsx [file c9sc03348c3.xlsx]

## Sheet: Table
RefCode in CSD	Compound name	Authors	Publication	Space Group	MOF periodicity, entanglement, (hkl) for layers, [hkl] for chains	Vertex transitivity	Underlying net in cluster of PE&M representation	Short side	Long side	RLR	Shortest π…π contact between ligands	Longest π…π contact between ligands	Shortest S...S contact between ligands	Longest S…S contact between ligands	Number of coordinated carboxylate groups	Stacks of parallel ligands
GUFBEQ	catena-[(\m-4-(2-[4,5-bis(4-carboxylatophenyl)-1,3-dithiol-2-ylidene]-5-(4-carboxylatophenyl)-1,3-dithiol-4-yl)benzoato)-bis(2,2'-bipyridine)-diaqua-di-cobalt(ii) N,N-dimethylformamide solvate tetrahydrate].	Bin Chen,Zhong-Peng Lv,C.F.Leong,Yue Zhao,D.D'Alessandro,Jing-Lin Zuo	CRYST.GROWTH DES.,2015,15,,1861	Pbcn	1D, [0,1,0]	1	(4,4)(0,2)	8.329	14.955	1.79553	4.130 (C-S)	4.130 (C-S)	4.157	4.157	4	slipped-parallel 1D column
ROYMOJ	catena-((\m~8~-4-(2-(4,5-bis(4-Carboxylatophenyl)-1,3-dithiol-2-ylidene)-5-(4-carboxylatophenyl)-1,3-dithiol-4-yl)benzoato)-(\m~2~-aqua)-aqua-cadmiumdimethylformamide ethanol solvate).	Park S.S.,Hontz E.R.,Lei SUN,Hendon C.H.,Walsh A.,Van VOORHIST.,Dinca M.	J.AM.CHEM.SOC.,2015,317,,1774	P65	3D	8	3,3,3,3,3,3,5,5T4 (PE&M)	8.691	15.217	1.75089	3.276 (C-C)	3.276 (C-C)	3.654	3.654	4	staggered 1D column
ROYMEZ	catena-((\m~8~-4-(2-(4,5-bis(4-Carboxylatophenyl)-1,3-dithiol-2-ylidene)-5-(4-carboxylatophenyl)-1,3-dithiol-4-yl)benzoato)-diaqua-di-manganesedimethylformamide ethanol solvate).	Park S.S.,Hontz E.R.,Lei SUN,Hendon C.H.,Walsh A.,Van VOORHIST.,Dinca M.	J.AM.CHEM.SOC.,2015,317,,1774	P65	3D	5	3,3,3,4,4T58 (PE&M)	8.785	15.141	1.72351	3.299 (C-C)	3.299 (C-C)	3.693	3.693	4	staggered 1D column
PEGCIP	catena-((\m~8~-4,4',4'',4'''-(Tetrathiafulvalene-4,4',5,5'-tetrayl)tetrakis(benzoato))-diaqua-di-zinc dimethylformamide ethanol solvate).	Narayan T.C.,Miyakai T.,Seki S.,Dinca M.	J.AM.CHEM.SOC.,2012,134,,12932	P65	3D	5	3,3,3,4,4T58 (PE&M)	8.756	15.16	1.73138	3.354 (C-C)	3.354 (C-C)	3.757	3.757	4	staggered 1D column
ROYMID	catena-((\m~8~-4-(2-(4,5-bis(4-Carboxylatophenyl)-1,3-dithiol-2-ylidene)-5-(4-carboxylatophenyl)-1,3-dithiol-4-yl)benzoato)-diaqua-di-cobaltdimethylformamide ethanol solvate).	Park S.S.,Hontz E.R.,Lei SUN,Hendon C.H.,Walsh A.,Van VOORHIST.,Dinca M.	J.AM.CHEM.SOC.,2015,317,,1774	P61	3D	5	3,3,3,4,4T58 (PE&M)	8.748	15.227	1.74063	3.343 (C-C)	3.343 (C-C)	3.773	3.773	4	staggered 1D column
FIKDEL	catena-[tetrakis(\m-4,4'-{2-[4,5-bis(4-carboxylatophenyl)-2H-1,3-dithiol-2-ylidene]-2H-1,3-dithiole-4,5-diyl}dibenzoato)-(\m-4-[2-[4-(4-carboxylatophenyl)-5-(4-carboxyphenyl)-2H-1,3-dithiol-2-ylidene]-5-(4-carboxyphenyl)-2H-1,3-dithiol-4-yl]benzoato)-octaaqua-tetrakis(N,N-dimethylformamide)-hexa-thuliumunknown solvate].	L.S.Xie,M.Dinca	Isr.J.Chem.,2018,,,	P-1	2D, (1,1,2)	5	3,3,3,6,6L4	8.347	15.347	1.83862	3.369 (C-C)	inapplicable	3.653	inapplicable	4+2	staggered dimer + monomer
KAMPAS	di-magnesium oxonium hexahydrogentris(4,4'-{2-[4,5-bis(4-carboxylatophenyl)-2H-1,3-dithiol-2-ylidene]-2H-1,3-dithiole-4,5-diyl}dibenzoate radical) dimethylformamide solvate monohydrate.	S.S.Park,C.H.Hendon,A.J.Fielding,A.Walsh,M.OKeeffe,M.Dinca	J.AM.CHEM.SOC.,2017,139,,3619	R-3	3D, 2-fold interpenetration	3	3,3,6-c net with point symbol {4.5^2}2{4^2.5^4.12^9}{5^3}	9.28	14.2515	1.53572	3.593 (C-S)	inapplicable	3.832	inapplicable	4	staggered trimer
LEPTOS	catena-[bis(Tetraethylammonium)bis(\m-2,3,6,7-tetrakis(4-carboxylatophenyl)tetrathiafulvalene)-di-indium(iii)N,N-dimethylformamide unknown solvate].	Jian Su,Shuai Yuan,Hai-Ying Wang,Lan Huang,Jing-Yuan Ge,E.Joseph,Junsheng Qin,T.Cagin,Jing-Lin Zuo,Hong-Cai Zhou	Nat.Commun.,2017,8,,2008	P-1	3D, 2-fold interpenetration	3	3,3,6T218	8.574	15.21	1.77397	4.585 (C-C)	4.747 (C-C)	5.058	6.195	4	eclipsed 1D column + dimer
GUFBUG	catena-[(\m-4-[2-[4-(4-carboxylatophenyl)-5-(4-carboxyphenyl)-1,3-dithiol-2-ylidene]-5-(4-carboxyphenyl)-1,3-dithiol-4-yl]benzoato)-diaqua-barium dmsfethanol solvate].	Bin Chen,Zhong-Peng Lv,C.F.Leong,Yue Zhao,D.D'Alessandro,Jing-Lin Zuo	CRYST.GROWTH DES.,2015,15,,1861	Ibam	3D	2	3,8-c new net with point symbol {4.6^2}4{4^4.6^4.8^12.10^8}	8.328	15.471	1.85771	4.124 (S-S)	4.124 (S-S)	4.124	4.124	4	eclipsed 1D column
LEPSUX	catena-[Dimethylammoniumbis((\m-2,3,6,7-tetrakis(4-carboxylatophenyl)tetrathiafulvalene radicalcation)-indium(iii)) triiodide cyclohexane solvate].	Jian Su,Shuai Yuan,Hai-Ying Wang,Lan Huang,Jing-Yuan Ge,E.Joseph,Junsheng Qin,T.Cagin,Jing-Lin Zuo,Hong-Cai Zhou	Nat.Commun.,2017,8,,2008	Cccm	3D, 2-fold interpenetration	2	dmd	8.413	15.297	1.81826	4.249 (S-S)	inapplicable	4.249	inapplicable	4	eclipsed dimer
LEPSOR	catena-[Dimethylammonium(\m-2,3,6,7-tetrakis(4-carboxylatophenyl)tetrathiafulvalene)-indium(iii)N,N-dimethylformamide ethanol solvate].	Jian Su,Shuai Yuan,Hai-Ying Wang,Lan Huang,Jing-Yuan Ge,E.Joseph,Junsheng Qin,T.Cagin,Jing-Lin Zuo,Hong-Cai Zhou	Nat.Commun.,2017,8,,2008	Cccm	3D, 2-fold interpenetration	2	dmd	8.272	15.414	1.86339	4.303 (S-S)	inapplicable	4.303	inapplicable	4	eclipsed dimer
LEPTAE	catena-[bis(Dimethylammonium)bis(\m-2,3,6,7-tetrakis(4-carboxylatophenyl)tetrathiafulvalene)-di-indium(iii)N,N-dimethylformamide ethanol solvate].	Jian Su,Shuai Yuan,Hai-Ying Wang,Lan Huang,Jing-Yuan Ge,E.Joseph,Junsheng Qin,T.Cagin,Jing-Lin Zuo,Hong-Cai Zhou	Nat.Commun.,2017,8,,2008	P-1	3D, 2-fold interpenetration	3	dmg	8.508	15.027	1.76622	3.559 (C-C)	inapplicable	3.687	inapplicable	4	eclipsed dimer
LEPTUY	catena-[bis(tetra-n-butylammonium)bis(\m-2,3,6,7-tetrakis(4-carboxylatophenyl)tetrathiafulvalene)-di-indium(iii)N,N-dimethylformamide unknown solvate].	Jian Su,Shuai Yuan,Hai-Ying Wang,Lan Huang,Jing-Yuan Ge,E.Joseph,Junsheng Qin,T.Cagin,Jing-Lin Zuo,Hong-Cai Zhou	Nat.Commun.,2017,8,,2008	P-1	3D, 2-fold interpenetration	3	dmg	8.547	15.117	1.76869	4.635 (C-C)	4.705 (C-C)	5.058	6.022	4	eclipsed 1D column
LEPTEI	catena-[Dimethylammoniumbis(\m-2,3,6,7-tetrakis(4-carboxylatophenyl)tetrathiafulvalene radicalcation)-di-indium(iii) triiodide cyclohexane solvate].	Jian Su,Shuai Yuan,Hai-Ying Wang,Lan Huang,Jing-Yuan Ge,E.Joseph,Junsheng Qin,T.Cagin,Jing-Lin Zuo,Hong-Cai Zhou	Nat.Commun.,2017,8,,2008	P2/m	3D, 2-fold interpenetration	3	dmg	8.569	15.252	1.7799	4.630 (C-C)	4.630 (C-C)	5.476	5.476	4	eclipsed 1D column + monomer
LEPTIM01	catena-[bis(Dimethylammonium)bis(\m-2,3,6,7-tetrakis(4-carboxylatophenyl)tetrathiafulvalene)-di-indium(iii)unknown solvate].	Jian Su,Shuai Yuan,Hai-Ying Wang,Lan Huang,Jing-Yuan Ge,E.Joseph,Junsheng Qin,T.Cagin,Jing-Lin Zuo,Hong-Cai Zhou	Nat.Commun.,2017,8,,2008	P-1	3D, 2-fold interpenetration	3	dmg	8.754	15.338	1.75211	4.510 (C-C)	4.576 (C-S)	5.058	5.7	4	eclipsed 1D column + dimer
LEPTIM	catena-[bis(Dimethylammonium)bis(\m-2,3,6,7-tetrakis(4-carboxylatophenyl)tetrathiafulvalene)-di-indium(iii)unknown solvate].	Jian Su,Shuai Yuan,Hai-Ying Wang,Lan Huang,Jing-Yuan Ge,E.Joseph,Junsheng Qin,T.Cagin,Jing-Lin Zuo,Hong-Cai Zhou	Nat.Commun.,2017,8,,2008	P-1	3D, 2-fold interpenetration	3	dmg	8.488	15.174	1.7877	4.557 (C-C)	4.791 (C-C)	5.069	6.118	4	eclipsed 1D column + dimer
GUFBIU	catena-[(\m-4-(2-[4,5-bis(4-carboxylatophenyl)-1,3-dithiol-2-ylidene]-5-(4-carboxylatophenyl)-1,3-dithiol-4-yl)benzoato)-(4,4'-bipyridine)-hexa-aqua-di-cobalt(ii) N,N-dimethylformamide solvate].	Bin Chen,Zhong-Peng Lv,C.F.Leong,Yue Zhao,D.D'Alessandro,Jing-Lin Zuo	CRYST.GROWTH DES.,2015,15,,1861	P3121	2D, inclined polycatenation, (1,0,0);(1,-1,0);(0,1,0)	1	fes	8.793	15.058	1.7125	3.325 (C-C)	3.325 (C-C)	no	no	4	staggered 1D column
PABRAO	catena-[hemikis(1,1'-dimethyl-4,4'-bipyridinium)(\m-4-(2-(4-(4-carboxylatophenyl)-5-(4-carboxyphenyl)-1,3-dithiol-2-ylidene)-5-(4-carboxyphenyl)-1,3-dithiol-4-yl)benzoato)-potassium unknown solvate].	Zhong-Peng Lv,Bin Chen,Hai-Ying Wang,Yue Wu,Jing-Lin Zuo	Small,2015,11,,3597	P-1	2D, (1,0,-1)	1	hcb	8.745	15.237	1.74237	3.621 (C-S)	3.667 (C-C)	3.75	3.792	3	eclipsed 1D column
UFIKEC	catena-[tris(2,3,6,7-tetrakis(4-carboxylatophenyl)tetrathiafulvalene)-bis(\m-oxo)-hexapyridine-hexa-iron(iii)(\m-oxo)-hexakis(\m-acetato)-diaqua-hydroxy-tri-iron(iii) bis(unknown anion)unknown solvate].	M.Souto,J.Romero,J.Calbo,I.J.Vitorica-Yrezabal,J.L.Zafra,J.C.Cordon,E.Orti,A.Walsh,G.M.Espallargas	J.AM.CHEM.SOC.,2018,140,,10562	P-62m	3D	2	stp	8.504	14.992	1.76294	inapplicable	inapplicable	inapplicable	inapplicable	4	no
GUFBOA	catena-[bis(\m-4-[2-[4-(4-carboxylatophenyl)-5-(4-carboxyphenyl)-1,3-dithiol-2-ylidene]-5-(4-carboxyphenyl)-1,3-dithiol-4-yl]benzoato)-(4,4'-ethane-1,2-diyldipyridine)-diaqua-di-cadmium(ii) N,N-dimethylformamide solvate hexahydrate].	Bin Chen,Zhong-Peng Lv,C.F.Leong,Yue Zhao,D.D'Alessandro,Jing-Lin Zuo	CRYST.GROWTH DES.,2015,15,,1861	P-1	3D	2	tfz-d	8.712	15.133	1.73703	3.731 (C-C)	4.058 (S-S)	4.058	4.162	3	slipped-parallel 1D column
UFIKIG	catena-[tris(2,3,6,7-tetrakis(4-carboxylatophenyl)tetrathiafulvalene)-bis(\m-oxo)-tetra-aqua-dihydroxy-hexa-iron(iii)(\m-oxo)-hexakis(\m-acetato)-diaqua-hydroxy-tri-iron(iii) unknown solvate].	M.Souto,J.Romero,J.Calbo,I.J.Vitorica-Yrezabal,J.L.Zafra,J.C.Cordon,E.Orti,A.Walsh,G.M.Espallargas	J.AM.CHEM.SOC.,2018,140,,10562	P-62m	3D	2	ttp	9.048	12.658	1.39898	inapplicable	inapplicable	inapplicable	inapplicable	4	no
UFIKOM	catena-[tris(2,3,6,7-tetrakis(4-carboxylatophenyl)tetrathiafulvalene)-bis(\m-oxo)-tetra-aqua-dihydroxy-hexa-iron(iii)(\m-oxo)-hexakis(\m-acetato)-diaqua-hydroxy-tri-iron(iii) unknown solvate].	Souto M.,Romero J.,Calbo J.,Vitorica-Yrezaba I.J,Zafra J.L.,Cordon J.C.,Orti E.,Walsh A.,Espallargas G.M.	J.AM.CHEM.SOC.,2018,140,,10562	P-62m	3D	2	ttp	8.879	13.444	1.51413	inapplicable	inapplicable	inapplicable	inapplicable	4	no
HETCOB	catena-((\m-oxo)-hexakis(\m-acetato)-triaqua-tri-irontris(\m-4,4'-{2-[4,5-bis(4-carboxyphenyl)-2H-1,3-dithiol-2-ylidene]-2H-1,3-dithiole-4,5-diyl}dibenzoato)-bis(\m-oxo)-tetra-aqua-dihydroxy-hexa-iron unknownsolvate).	M.Souto,A.Santiago-Portillo,M.Palomino,I.J.Vitorica-Yrezabal,B.J.C.Vieira,J.C.Waerenborgh,S.Valencia,S.Navalon,F.Rey,H.Garcia,G.M.Espallargas	Chemical Science,2018,9,,2413	P-62m	3D	2	ttp	8.687	14.147	1.62853	inapplicable	inapplicable	inapplicable	inapplicable	4	no
UFIHUP	catena-(tris(2,3,6,7-tetrakis(4-carboxylatophenyl)tetrathiafulvalene)-bis(\m-oxo)-tetra-aqua-dihydroxy-hexa-iron(iii)(\m-oxo)-hexakis(\m-acetato)-diaqua-hydroxy-tri-iron(iii) unknown solvate).	M.Souto,J.Romero,J.Calbo,I.J.Vitorica-Yrezabal,J.L.Zafra,J.C.Cordon,E.Orti,A.Walsh,G.M.Espallargas	J.AM.CHEM.SOC.,2018,140,,10562	P-62m	3D	2	ttp	8.68	14.142	1.62926	inapplicable	inapplicable	inapplicable	inapplicable	4	no
QIVMEQ	catena-(tris(μ-4,4'-{2-[4,5-bis(4-carboxylatophenyl)-2H-1,3-dithiol-2-ylidene]-2H-1,3-dithiole-4,5-diyl}dibenzoato)-hexa-aqua-tetra-terbium dimethylformamide unknown solvate)	Jian Su, Tian-Hao Hu, Ryuichi Murase, Hai-Ying Wang, Deanna M. D’Alessandro, Mohamedally Kurmoo, Jing-Lin Zuo	Inorganic Chemistry, 2019, 58, 3698	P -1	3D	6	3,3,3,3,6,8-c net with point symbol {4.6^2}4{4^2.5^4.6^2.8^6.9}{4^2.5^4.6^4.7^8.8^6.9^2.10.11}{5.6.7}2{5.7^2}2	8	15.541	1.94	3.852 (S-S)	6.293 (S-S)	3.852	6.293	4	eclipsed 1D column
QIVMIU	catena-(tris(μ-4,4'-{2-[4,5-bis(4-carboxylatophenyl)-2H-1,3-dithiol-2-ylidene]-2H-1,3-dithiole-4,5-diyl}dibenzoato)-hexa-aqua-tetra-dysprosium dimethylformamide unknown solvate)	Jian Su, Tian-Hao Hu, Ryuichi Murase, Hai-Ying Wang, Deanna M. D’Alessandro, Mohamedally Kurmoo, Jing-Lin Zuo	Inorganic Chemistry, 2019, 58, 3698	P -1	3D	6	3,3,3,3,6,8-c net with point symbol {4.6^2}4{4^2.5^4.6^2.8^6.9}{4^2.5^4.6^4.7^8.8^6.9^2.10.11}{5.6.7}2{5.7^2}2	8.133	15.472	1.9	3.623 (S-C)	6.328 (S-S)	3.771	6.328	4	eclipsed 1D column
QIVNIV	catena-(tris(μ-4,4'-{2-[4,5-bis(4-carboxylatophenyl)-2H-1,3-dithiol-2-ylidene]-2H-1,3-dithiole-4,5-diyl}dibenzoato)-hexa-aqua-tetra-terbium bis(tri-iodide) unknown solvate)	Jian Su, Tian-Hao Hu, Ryuichi Murase, Hai-Ying Wang, Deanna M. D’Alessandro, Mohamedally Kurmoo, Jing-Lin Zuo	Inorganic Chemistry, 2019, 58, 3698	P -1	3D	6	3,3,3,3,6,8-c net with point symbol {4.6^2}4{4^2.5^4.6^2.8^6.9}{4^2.5^4.6^4.7^8.8^6.9^2.10.11}{5.6.7}2{5.7^2}2	7.72	14.955	1.94	3.570 (S-C)	inapplicable	3.841	inapplicable	4	eclipsed dimer
QIVMUG	catena-(tris(μ-4,4'-{2-[4,5-bis(4-carboxylatophenyl)-2H-1,3-dithiol-2-ylidene]-2H-1,3-dithiole-4,5-diyl}dibenzoato)-hexa-aqua-tetra-erbium dimethylformamide unknown solvate)	Jian Su, Tian-Hao Hu, Ryuichi Murase, Hai-Ying Wang, Deanna M. D’Alessandro, Mohamedally Kurmoo, Jing-Lin Zuo	Inorganic Chemistry, 2019, 58, 3698	P -1	3D	6	3,3,3,3,6,8-c net with point symbol {4.6^2}4{4^2.5^4.6^2.8^6.9}{4^2.5^4.6^4.7^8.8^6.9^2.10.11}{5.6.7}2{5.7^2}2	7.959	15.419	1.94	3.600 (C-C)	6.512 (S-S)	3.88	6.512	4	eclipsed 1D column
QIVMOA	catena-(tris(μ-4,4'-{2-[4,5-bis(4-carboxylatophenyl)-2H-1,3-dithiol-2-ylidene]-2H-1,3-dithiole-4,5-diyl}dibenzoato)-hexa-aqua-tetra-holmium dimethylformamide unknown solvate)	Jian Su, Tian-Hao Hu, Ryuichi Murase, Hai-Ying Wang, Deanna M. D’Alessandro, Mohamedally Kurmoo, Jing-Lin Zuo	Inorganic Chemistry, 2019, 58, 3698	P -1	3D	6	3,3,3,3,6,8-c net with point symbol {4.6^2}4{4^2.5^4.6^2.8^6.9}{4^2.5^4.6^4.7^8.8^6.9^2.10.11}{5.6.7}2{5.7^2}2	8.006	15.72	1.96	3.508 (C-C)	6.420 (S-S)	3.862	6.42	4	eclipsed 1D column
